# Supplementary material for: Snf1 Kinase Differentially Regulates Botrytis cinerea Pathogenicity according to the Plant Host
Source: MDPI journal article supplement (doi:10.3390/microorganisms10020444), 2022-02-15
Supplement: s1 [file s1]

| Name          | Sequence                                         | Melting temperature (°C) | Product size (bp) |
|---------------|--------------------------------------------------|--------------------------|-------------------|
| Snf1-5'-For   | 5' TAGTACCTGGCGCTTCTGTG 3'                       | 66                       | 1182              |
| Snf1-5'-Rev   | 5' CCGGCCCGAATCGGGAAAATGTGGTTGAACGGTGGTT 3'      |                          |                   |
| Snf1-3'-For   | 5' CGTCCGAGGGCAAAGGAATAGGTTCTGTTGGTTATTGAATCG 3' | 65                       | 859               |
| Snf1-3'-Rev   | 5' CAACCAAAGAAATGAAGTTCTCAC 3'                   |                          |                   |
| Hyg-For       | 5' TTCCCGATTCCGGCCGG 3'                          | 60                       | 1848              |
| Hyg-Rev       | 5' CTATTCCTTTGCCCTCGGAC 3'                       |                          |                   |
| Snf1-5'-For   | 5' TAGTACCTGGCGCTTCTGTG 3'                       | 66                       | 2750              |
| Hyg-Nest-Rev  | 5' GGATGCCTCCGCTCGAAGTA 3'                       |                          |                   |
| Hyg-Nest-For  | 5' CAG CGA GAG CCT GAC CTA TTG 3'                | 65                       | 1617              |
| Snf1-3'-Rev   | 5' CAACCAAAGAAATGAAGTTCTCAC 3'                   |                          |                   |
| Snf1-M-5'-For | 5' GCGTGGGATCGAGTTATTGC 3'                       | 64                       | 1719              |
| Snf1-M-5'-Rev | 3' GCCCTGACTACCTTGCTACGG 5'                      |                          |                   |
| Snf1-M-3'-For | 5' CAATGTCCTGACGGACAATG 3'                       | 61                       | 1438              |
| Snf1-M-3'-Rev | 5' GATTCGGATTTCTTTTGATGAGG 3'                    |                          |                   |
| Snf1-WT-For   | 5' GCATTCAGCCTCGACCTAGC 3'                       | 64                       | 643               |
| Snf1-WT-Rev   | 5' CCCATGGATCTTCTGGCAAC 3'                       |                          |                   |
| Hyg-Probe-For | 5' CAAGCTGCATCATCGAAATTGC 3'                     | 55                       | 818               |
| Hyg-Probe-Rev | 5' ATCGAAAAGTCCGACAGCGTC 3'                      |                          |                   |
| Snf1-Comp-For | 5' CCATGATGCTAGGGGAGG 3'                         | 68                       | 4408              |
| Snf1-Comp-Rev | 5' GATGATATTGGCGACCCG 3'                         |                          |                   |
| Nourseo-For   | 5' GAGCGGATTCCTCAGTCTC 3'                        | 69                       | 2028              |
| Nourseo-Rev   | 5' GAGTGAGCTGATACCGCTCG 3'                       |                          |                   |
| Snf1-5'-For   | 5' TAGTACCTGGCGCTTCTGTG 3'                       | 60                       | 3296              |
| Snf1-WT-Rev   | 5' CCCATGGATCTTCTGGCAAC 3'                       |                          |                   |
| Snf1-WT-For   | 5' GCATTCAGCCTCGACCTAGC 3'                       | 59                       | 1845              |
| Snf1-3'-Rev   | 5' CAACCAAAGAAATGAAGTTCTCAC 3'                   |                          |                   |
| Bc-Tub-For    | 5' GTCTCAAGATGTCTCCACC 3'                        | 62                       | 143               |
| Bc-Tub-Rev    | 5' ACTCCATCTCGTCCATACCT 3'                       |                          |                   |
| Snf1-ORF-For  | 5' CGAACCATCACCTCAAACAGAC 3'                     | 62                       | 291               |
| Snf1-ORF-Rev  | 5' ATCATTGCGATTATTCCC GTTACC 3'                  |                          |                   |

**Supplementary Table S1: Sequences of the primers pairs used in this study**
